# Supplementary material for: Early surgical reconstruction versus rehabilitation with elective delayed reconstruction for patients with anterior cruciate ligament rupture: COMPARE randomised controlled trial
Source: PubMed Central journal article supplement (PMC7941216; doi:10.1136/bmj.n375), 2021-03-09
Supplement: reim061484.ww1.pdf [file reim061484.ww1.pdf]

**eTable 1: post-hoc as-treated results for primary outcome (estimated International Knee Documentation Committee Score (IKDC<sup>a</sup>))**

|                              | baseline             | FU<br>3 months       | FU<br>6 months       | FU<br>9 months       | FU<br>12 months      | FU<br>24 months      |
|------------------------------|----------------------|----------------------|----------------------|----------------------|----------------------|----------------------|
| <b>IKDC</b>                  |                      |                      |                      |                      |                      |                      |
| - Early ACL reconstruction   | 47.1<br>(43.5; 50.7) | 53.4<br>(50.1; 56.8) | 69.0<br>(65.5; 72.6) | 77.4<br>(73.7; 81.1) | 81.2<br>(77.9; 84.5) | 85.9<br>(82.6; 89.1) |
| - Delayed ACL reconstruction | 50.7<br>(45.3; 56.0) | 58.5<br>(53.8; 63.2) | 59.2<br>(54.3; 64.1) | 61.1<br>(56.0; 66.2) | 67.1<br>(62.4; 71.9) | 78.4<br>(73.7; 83.1) |
| - Non-operative              | 43.3<br>(37.9; 48.8) | 69.1<br>(64.3; 73.8) | 76.4<br>(71.3; 81.5) | 77.9<br>(72.7; 83.1) | 82.5<br>(77.6; 87.5) | 83.5<br>(78.8; 88.3) |

Data are presented as mean and 95% confidence interval between parentheses

a adjusted for sex, BMI, and age

FU = follow-up

A higher International Knee Documentation Committee score reflects more favourable patients ratings of symptoms knee function and ability to participate in sports activities (optimal score is 100)
